# Supplementary material for: Phthalate Concentrations and Dietary Exposure from Food Purchased in New York State
Source: PubMed Central journal article supplement (PMC3620091; doi:10.1289/ehp.1206367), 2013-03-06
Supplement: ehp.1206367.s001.pdf [file ehp.1206367.s001.pdf]

## **Supplemental Material**

# **Phthalate Concentrations and Dietary Exposure from Food Purchased in New York State**

Arnold Schecter, Matthew Lorber, Ying Guo, Qian Wu, Se Hun Yun, Kurunthachalam Kannan, Madeline Hommel, Nadia Imran, Linda S. Hynan, Dunlei Cheng, Justin A. Colacino, and Linda S. Birnbaum

**Supplemental Material, Table S1.** Concentrations of phthalates (ng/g wet wt) measured in foodstuffs from Albany, New York, USA in 2011 for each individual sample. Samples below the level of detection (LOD) are indicated by “\*”.

| Category    | Sample          | Container Type | DMP (0.2) <sup>a</sup> | DEP (0.2) | DiBP (0.2) | DBP (1.4) | DnHP (0.2) | BBzP (0.2) | DCHP (0.2) | DEHP (3.7) | DnOP (1.0) |
|-------------|-----------------|----------------|------------------------|-----------|------------|-----------|------------|------------|------------|------------|------------|
| Beverages   | Diet lemon tea  | Plastic        | *                      | *         | 0.64       | *         | *          | *          | *          | 18.2       | *          |
|             | Lemonade        | Plastic        | *                      | *         | *          | *         | *          | *          | *          | *          | *          |
|             | Soda            | Plastic        | 0.22                   | *         | *          | *         | *          | *          | *          | *          | *          |
|             | Bottled water   | Plastic        | *                      | *         | *          | *         | *          | *          | *          | *          | *          |
|             | Green tea       | Plastic        | *                      | *         | *          | *         | *          | *          | *          | *          | *          |
|             | Sports drink    | Plastic        | *                      | *         | *          | *         | *          | *          | *          | *          | *          |
|             | Sports drink    | Plastic        | *                      | *         | 0.23       | *         | *          | *          | *          | *          | *          |
|             | Apple juice     | Plastic        | 0.23                   | *         | 0.95       | *         | *          | *          | *          | *          | *          |
| Milk        | Milk            | Plastic        | *                      | *         | *          | *         | *          | *          | *          | 28         | 2.52       |
|             | Milk            | Plastic        | *                      | 0.24      | 0.3        | 2.3       | *          | 0.99       | *          | 69.1       | *          |
| Other Dairy | Pudding         | Plastic        | *                      | *         | 0.75       | 31.7      | *          | *          | *          | 92.8       | *          |
|             | Sliced cheese   | Plastic        | 0.85                   | 0.66      | 4.01       | 138       | *          | 0.49       | 1.86       | 69.7       | *          |
|             | Ice cream       | Paper          | *                      | 1.91      | 0.57       | 4.77      | 0.21       | 1.89       | *          | 341        | 20.8       |
|             | Ice cream       | Paper          | *                      | 0.86      | 1.81       | *         | 8.82       | 18.3       | *          | 10.2       | *          |
|             | Butter          | Paper          | 0.7                    | 0.55      | 1.19       | 252       | 1.58       | *          | *          | 275        | *          |
|             | Butter          | Paper          | 1.54                   | 2.78      | 0.79       | *         | *          | 5.02       | *          | 200        | *          |
|             | Shredded cheese | Plastic        | 0.73                   | 5.27      | 7.87       | 513       | *          | 10.8       | *          | 285        | *          |
|             | Yogurt          | Plastic        | *                      | *         | *          | *         | *          | *          | *          | 3.71       | *          |
|             | Yogurt          | Plastic        | *                      | *         | *          | *         | *          | 1.2        | *          | 16.6       | *          |
| Fish        | Salmon fillet   | Foam/ plastic  | 0.43                   | 1.03      | *          | *         | *          | 2.43       | *          | 54.8       | *          |
|             | Tuna            | Plastic        | *                      | 0.93      | 3.7        | 47.5      | *          | *          | *          | 39.6       | *          |
|             | Raw shrimp      | Plastic        | *                      | *         | *          | *         | *          | *          | *          | *          | *          |
|             | Chopped clams   | Metal          | *                      | *         | *          | *         | *          | *          | *          | 6.53       | *          |

| Category          | Sample             | Container Type | DMP (0.2) <sup>a</sup> | DEP (0.2) | DiBP (0.2) | DBP (1.4) | DnHP (0.2) | BBzP (0.2) | DCHP (0.2) | DEHP (3.7) | DnOP (1.0) |
|-------------------|--------------------|----------------|------------------------|-----------|------------|-----------|------------|------------|------------|------------|------------|
|                   | Sardines           | Metal          | 0.32                   | 0.86      | 0.99       | 5.5       | 0.25       | 5.32       | *          | 55.8       | *          |
| Fruits/Vegetables | Tomato sauce       | Metal          | *                      | 0.2       | 1.2        | *         | *          | *          | *          | *          | *          |
|                   | Canned fruits      | Plastic        | *                      | *         | *          | *         | *          | *          | *          | *          | *          |
|                   | Vegetable soup     | Plastic        | *                      | *         | 0.48       | *         | *          | 0.34       | *          | 21.7       | *          |
|                   | Vegetable soup     | Plastic        | *                      | *         | 0.67       | *         | *          | 2.72       | *          | *          | *          |
|                   | Canned fruits      | Metal          | *                      | *         | 0.28       | *         | *          | *          | *          | 3.74       | *          |
| Grain             | Cookies            | Paper          | 0.34                   | 0.75      | 4.01       | 11.7      | *          | 1.95       | *          | 151        | *          |
|                   | Cake mix           | Paper          | *                      | 0.45      | 0.68       | 5.14      | 0.27       | 7.25       | *          | 41.5       | *          |
|                   | Cereals            | Paper          | *                      | 2.72      | 14         | 30.6      | *          | 4.76       | *          | 20         | *          |
|                   | Cookies            | Plastic        | 0.29                   | 1.17      | *          | *         | 0.34       | 0.5        | *          | 39.4       | *          |
|                   | Bread              | Plastic        | 0.44                   | 78.8      | 1.06       | 3.35      | 0.61       | 2.1        | *          | 69.6       | *          |
|                   | Cookies            | Paper          | 0.35                   | 0.43      | 3.27       | 57.9      | *          | 20.2       | *          | 50.6       | *          |
|                   | Rice               | Paper          | 0.47                   | 3.55      | 1.64       | 1.7       | *          | 4.65       | *          | 59.1       | *          |
| Beef              | Ground beef        | Plastic, paper | 0.25                   | 0.83      | *          | *         | 4.83       | 1.11       | *          | *          | *          |
|                   | Beef               | Foam/ plastic  | *                      | 0.45      | *          | *         | *          | *          | *          | *          | 6.64       |
| Pork              | Sausage links      | Foam/ plastic  | *                      | 0.22      | *          | *         | *          | *          | *          | 8.16       | *          |
|                   | Pork               | Foam/ plastic  | 0.89                   | 0.6       | *          | *         | *          | *          | *          | *          | *          |
|                   | Pork bacon         | Plastic/ paper | 0.21                   | 0.82      | 24.7       | *         | *          | *          | *          | 33.1       | *          |
|                   | Ham                | Plastic        | *                      | 0.57      | *          | *         | *          | 0.6        | *          | 1158       | 9.95       |
| Poultry           | Ground turkey      | Foam/ plastic  | 0.2                    | 0.32      | *          | *         | *          | *          | *          | 22.6       | *          |
|                   | Ground chicken     | Foam/ plastic  | 0.21                   | 0.74      | *          | *         | *          | *          | *          | 7          | *          |
|                   | Chicken drumsticks | Foam/ plastic  | *                      | 0.34      | *          | *         | *          | 1.99       | *          | 6          | *          |
|                   | Turkey breast      | Plastic        | *                      | 0.73      | *          | *         | *          | *          | *          | 36.4       | *          |
|                   | Turkey bacon       | Plastic/ paper | *                      | 0.25      | *          | *         | *          | *          | *          | 38         | *          |
|                   | Chicken franks     | Plastic        | 0.21                   | *         | *          | *         | 0.73       | 1.58       | *          | *          | *          |
| Hotdog            | Hotdog             | Plastic        | 0.3                    | 0.39      | *          | *         | *          | *          | *          | 6.36       | *          |
| Vegetable Oils    | Canola oil         | Plastic        | *                      | *         | *          | *         | *          | 2.2        | *          | *          | *          |

| Category                                            | Sample                       | Container Type         | DMP (0.2) <sup>a</sup> | DEP (0.2) | DiBP (0.2) | DBP (1.4) | DnHP (0.2) | BBzP (0.2) | DCHP (0.2) | DEHP (3.7) | DnOP (1.0) |
|-----------------------------------------------------|------------------------------|------------------------|------------------------|-----------|------------|-----------|------------|------------|------------|------------|------------|
|                                                     | Virgin olive oil             | Glass                  | 3.41                   | *         | 9.26       | 9.2       | *          | 459        | 42.6       | 300        | *          |
|                                                     | Vegetable oil                | Plastic                | *                      | *         | 0.25       | *         | 0.37       | 0.35       | *          | 48.9       | 1.51       |
| Condiments                                          | Pudding syrup                | Plastic                | *                      | *         | 0.44       | *         | *          | 0.3        | *          | 21.2       | *          |
|                                                     | Marinade                     | Glass                  | 0.29                   | *         | 1.03       | 6.66      | *          | 3.34       | 0.29       | 7.36       | *          |
|                                                     | Barbecue sauce               | Plastic                | *                      | *         | *          | *         | *          | *          | *          | *          | *          |
|                                                     | Italian dressing             | Plastic                | 0.86                   | 0.29      | 2.82       | 80.9      | *          | *          | *          | 103        | *          |
|                                                     | Ranch                        | Plastic                | 0.5                    | 3.8       | 0.66       | 2.5       | *          | 2.35       | *          | 29.1       | 4.61       |
|                                                     | Tomato ketchup               | Plastic                | *                      | 0.21      | 0.95       | *         | *          | 5.77       | *          | 20         | *          |
| Infant Food                                         | Rice cereal                  | Paper                  | *                      | 0.54      | 2.71       | 2.93      | *          | 1.22       | 0.69       | 95.2       | *          |
|                                                     | Readymade meal for baby      | Plastic                | *                      | 0.4       | 0.22       | 1.55      | *          | 11.7       | *          | 105        | 6.13       |
|                                                     | Readymade meal for baby      | Plastic                | *                      | 0.92      | 0.95       | *         | *          | 3.5        | *          | 29.4       | *          |
|                                                     | Fruit homogenate             | Plastic                | *                      | 0.28      | 1.19       | *         | *          | 3.53       | *          | 15.8       | *          |
|                                                     | Vegetable homogenate         | Plastic                | *                      | *         | 0.11       | *         | *          | 1.13       | *          | 23.8       | *          |
|                                                     | Fruit homogenate             | Glass                  | *                      | *         | *          | *         | *          | 2.37       | *          | 235        | 8.85       |
|                                                     | Food homogenate              | Glass                  | *                      | *         | *          | *         | *          | *          | *          | 21.2       | *          |
| Measured, but not included in other food categories | Chicken noodles              | Plastic                | *                      | 0.47      | 1.18       | 39.6      | *          | 4.7        | 1.56       | 25.3       | *          |
|                                                     | Chicken pot pie              | Paper plate, paper box | *                      | 1.37      | *          | *         | *          | 0.83       | *          | 32.1       | *          |
|                                                     | Pizza                        | Plastic                | 0.47                   | 3.61      | *          | *         | *          | 0.94       | *          | 63.2       | *          |
|                                                     | Turkey & dressing with gravy | Plastic                | 0.22                   | 1.29      | 2.91       | 14.7      | 0.6        | 30.6       | *          | 175        | 26.1       |
|                                                     | Instant noodles              | Plastic                | 0.51                   | 1.36      | 2.5        | 74.7      | *          | *          | *          | 41.6       | *          |
|                                                     | Onion soup mix               | Paper                  | 0.33                   | 2.68      | 0.39       | 1.58      | *          | 1.41       | *          | 138        | *          |
|                                                     | Noodle soup                  | Metal                  | *                      | *         | *          | *         | *          | 1.69       | *          | 7.56       | *          |

<sup>a</sup> The limit of detection for each phthalate ester is indicated in parenthesis.
